# Supplementary material for: Effects of orientation at the phthalocyanine–CdSe interface on the electron transfer characteristics
Source: Royal Society of Chemistry journal article supplement (doi:10.1039/c7cp00833c), 2017-01-01
Supplement: c7cp00833c1.pdf [file c7cp00833c1.pdf]

Table S1. The energies (eV) of the CdSe bands, HOMO/LUMO of the anchored phthalocyanine molecule and HOMO of the phenylbutyric linker, calculated using BAND code with different exchange-correlation functionals.

|               | PBEsol         |                | BLYP           |                | LDA            |                |
|---------------|----------------|----------------|----------------|----------------|----------------|----------------|
|               | <i>ca.</i> 80° | <i>ca.</i> 30° | <i>ca.</i> 80° | <i>ca.</i> 30° | <i>ca.</i> 80° | <i>ca.</i> 30° |
| Tilting angle | <i>ca.</i> 80° | <i>ca.</i> 30° | <i>ca.</i> 80° | <i>ca.</i> 30° | <i>ca.</i> 80° | <i>ca.</i> 30° |
| VBM           | -5.91          | -5.88          | -5.55          | -5.53          | -6.10          | -6.06          |
| CBM           | -4.42          | -4.35          | -4.06          | -4.00          | -4.71          | -4.64          |
| Linker        | -5.71          | -5.70          | -5.42          | -5.43          | -5.96          | -5.90          |
| PC-HOMO       | -5.03          | -5.15          | -4.72          | -4.83          | -5.25          | -5.38          |
| PC-LUMO       | -3.63          | -3.77          | -3.34          | -3.46          | -3.86          | -4.00          |

Table S2. The energies (eV) of the CdSe bands, HOMO/LUMO of the anchored phthalocyanine molecule and HOMO of the phenylbutyric linker, calculated using BAND code with PBEsol functional and different basis sets.

|               | DZ             |                | TZP            |                | TZ2P           |                |
|---------------|----------------|----------------|----------------|----------------|----------------|----------------|
|               | <i>ca.</i> 80° | <i>ca.</i> 30° | <i>ca.</i> 80° | <i>ca.</i> 30° | <i>ca.</i> 80° | <i>ca.</i> 30° |
| Tilting angle | <i>ca.</i> 80° | <i>ca.</i> 30° | <i>ca.</i> 80° | <i>ca.</i> 30° | <i>ca.</i> 80° | <i>ca.</i> 30° |
| VBM           | -6.21          | -6.15          | -5.91          | -5.88          | -5.88          | -5.85          |
| CBM           | -4.75          | -4.64          | -4.42          | -4.35          | -4.40          | -4.34          |
| Linker        | -6.05          | -6.06          | -5.71          | -5.70          | -5.74          | -5.73          |
| PC-HOMO       | -5.54          | -5.71          | -5.03          | -5.15          | -5.05          | -5.17          |
| PC-LUMO       | -4.10          | -4.29          | -3.63          | -3.77          | -3.64          | -3.75          |

Table S3. The energies (eV) of the CdSe bands, HOMO/LUMO of the anchored phthalocyanine molecule and HOMO of the phenylbutyric linker, calculated using plane-wave approach implemented in VASP code with different exchange-correlation functionals. The cutoff energy was 700 eV. We used a 3×1×3 Monkhorst-Pack grid for the k-point sampling in LDA and GGA PBEsol calculations and a gamma point in PBE0 calculations.

|               | PBEsol         |                | PBE0           |                | LDA            |                |
|---------------|----------------|----------------|----------------|----------------|----------------|----------------|
|               | <i>ca.</i> 80° | <i>ca.</i> 30° | <i>ca.</i> 80° | <i>ca.</i> 30° | <i>ca.</i> 80° | <i>ca.</i> 30° |
| Tilting angle | <i>ca.</i> 80° | <i>ca.</i> 30° | <i>ca.</i> 80° | <i>ca.</i> 30° | <i>ca.</i> 80° | <i>ca.</i> 30° |
| VBM           | -3.53          | -3.50          | -4.26          | -4.33          | -3.68          | -3.64          |
| CBM           | -2.45          | -2.40          | -1.63          | -1.68          | -2.68          | -2.63          |
| Linker        | -3.44          | -3.45          | -4.24          | -4.31          | -3.62          | -3.60          |
| PC-HOMO       | -2.78          | -2.89          | -3.28          | -3.41          | -2.95          | -3.06          |
| PC-LUMO       | -1.56          | -1.69          | -0.97          | -1.12          | -1.71          | -1.86          |
